# Supplementary material for: Colorectal Cancer Progression Is Potently Reduced by a Glucose-Free, High-Protein Diet: Comparison to Anti-EGFR Therapy
Source: MDPI journal article supplement (doi:10.3390/cancers13225817), 2021-11-19

**Figure S1.** Full Western blots.

**Figure 3h**

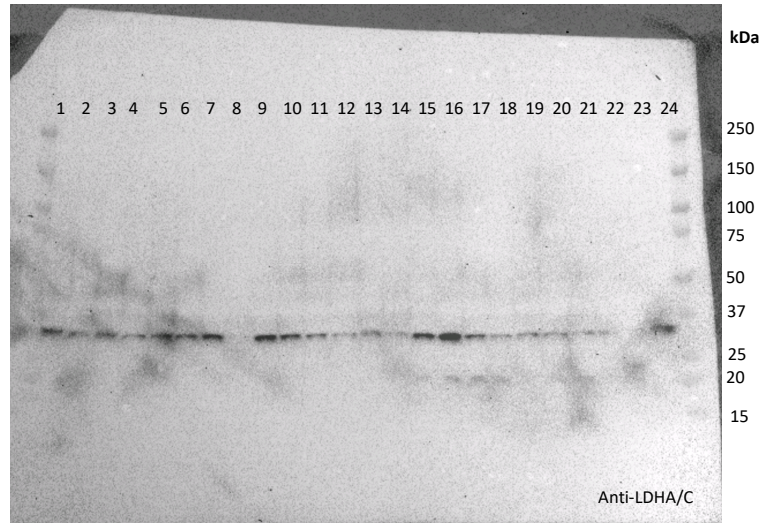

**Figure 3h-j; m, n**

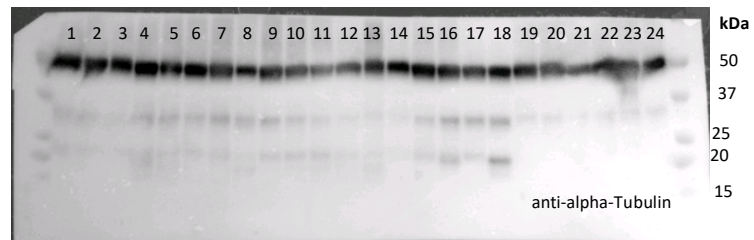

**Figure 3j**

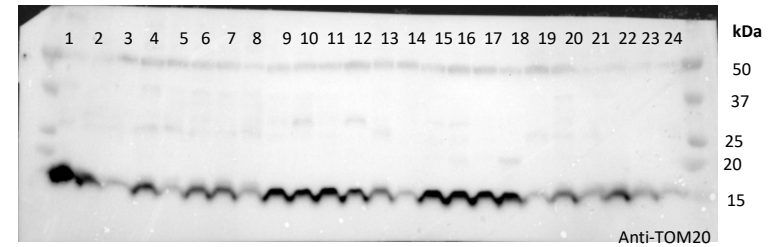

**Figure 3i**

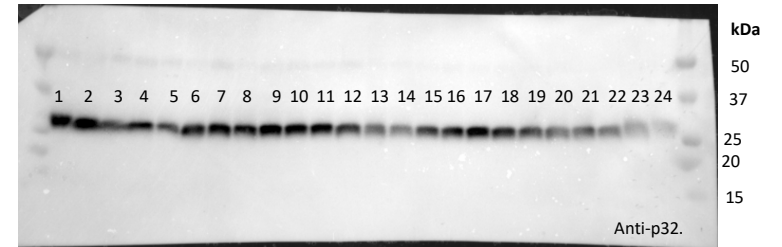

**Figure 3m**

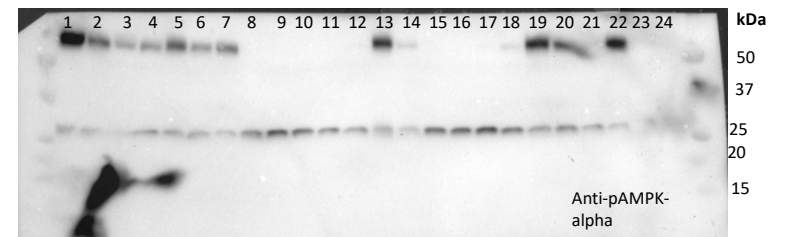

**Figure 3n**

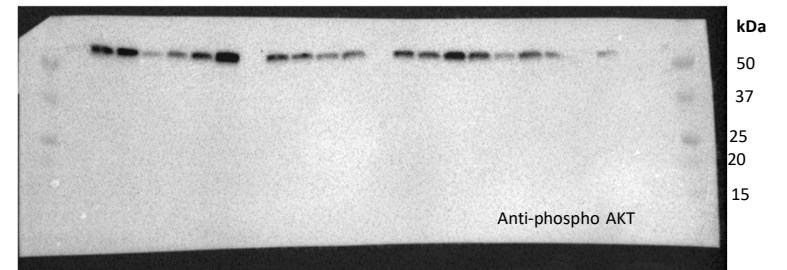

Figure 3k

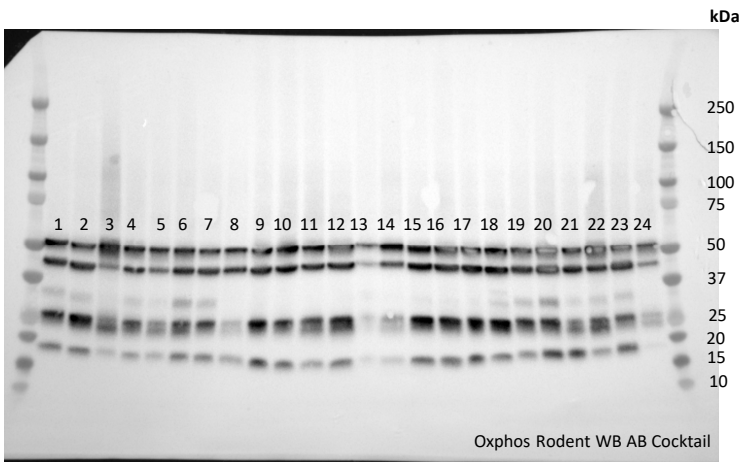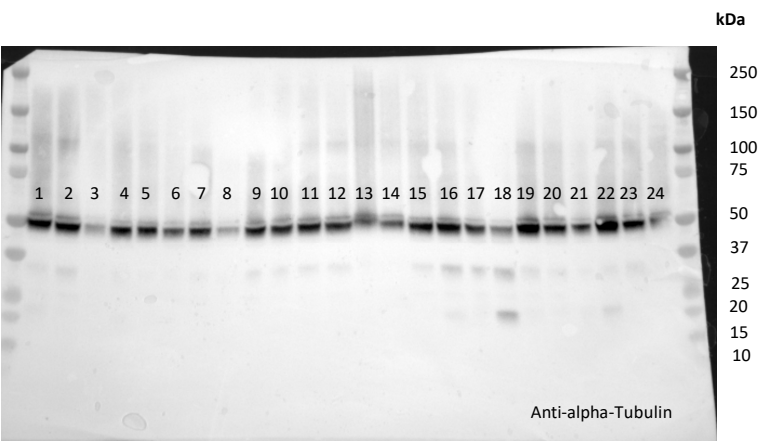

Figure 4k

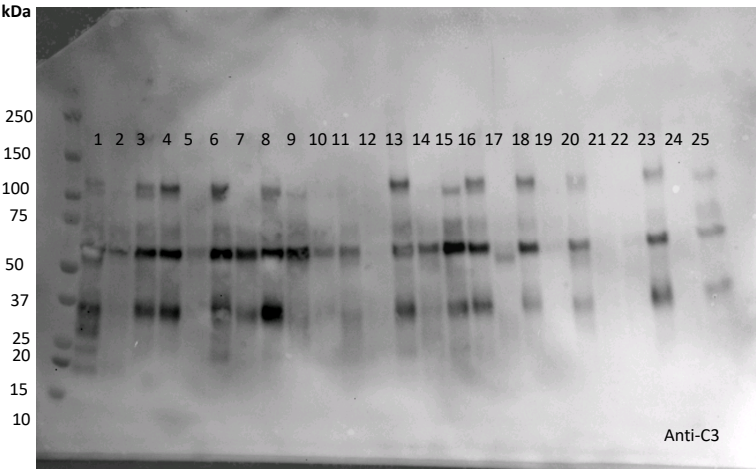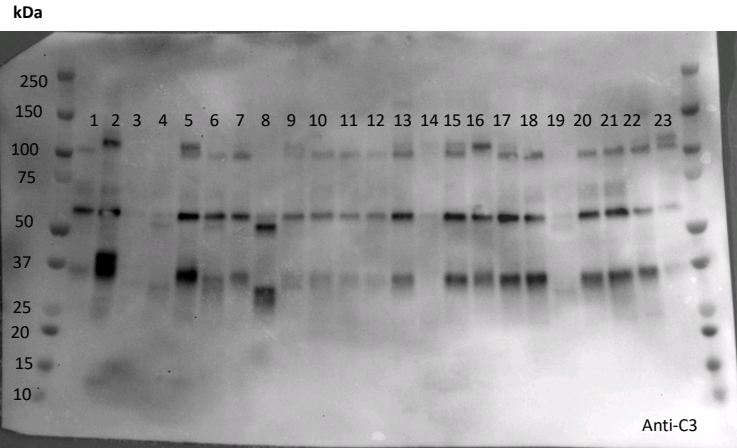

Figure 5e

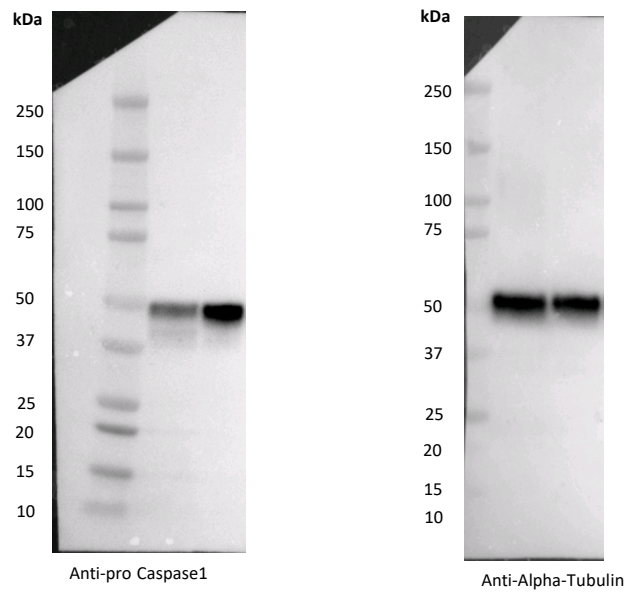

Figure 5d

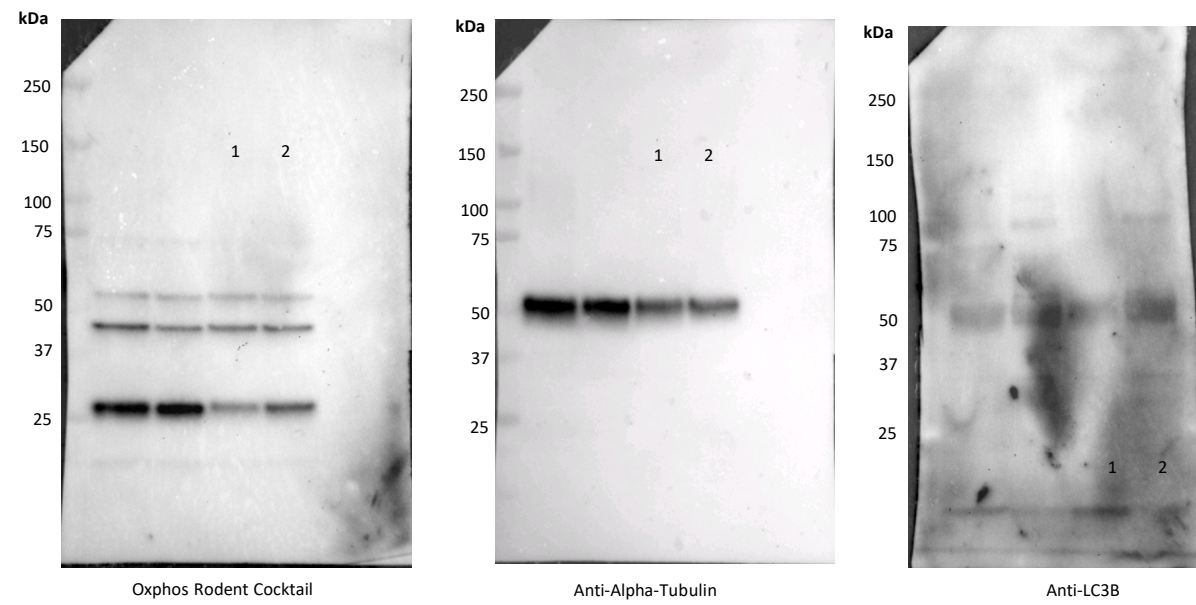

Figure 5f

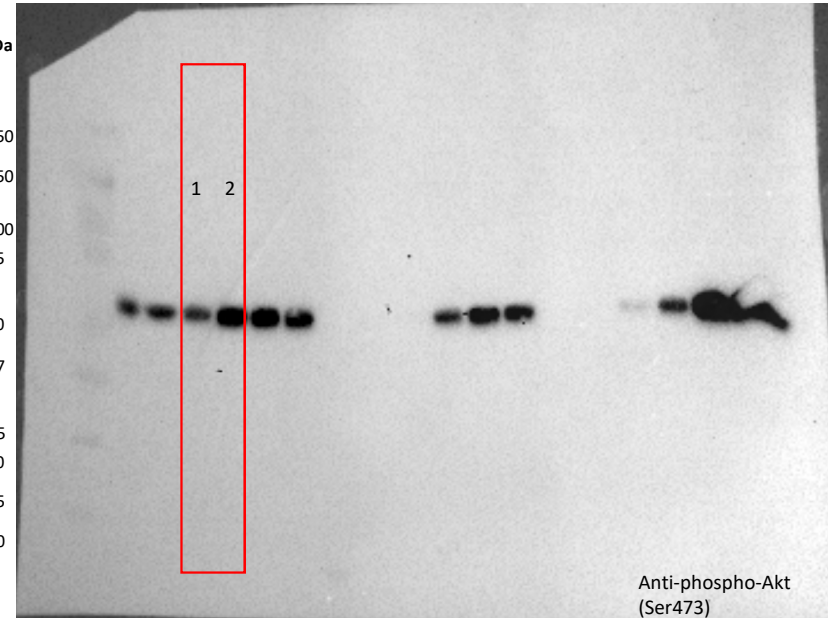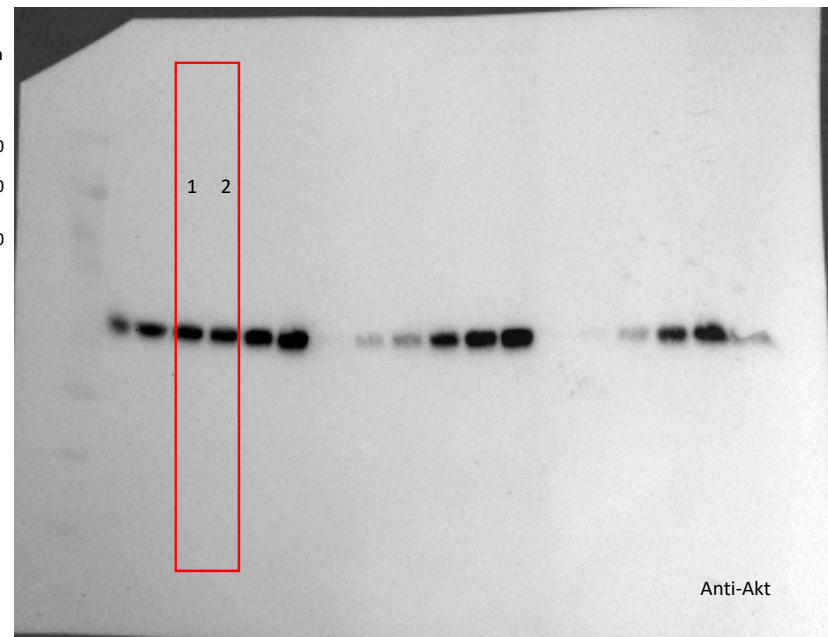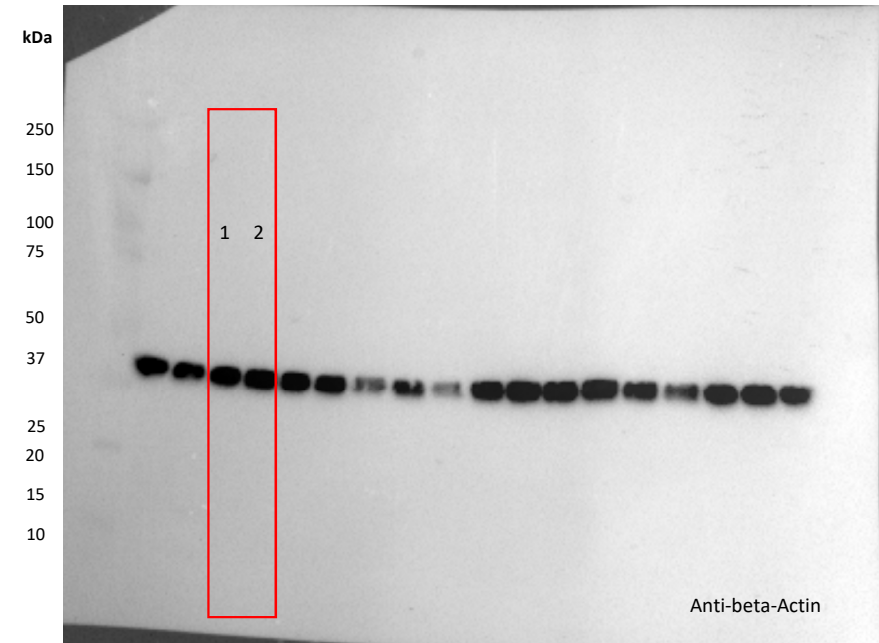

Figure 6f

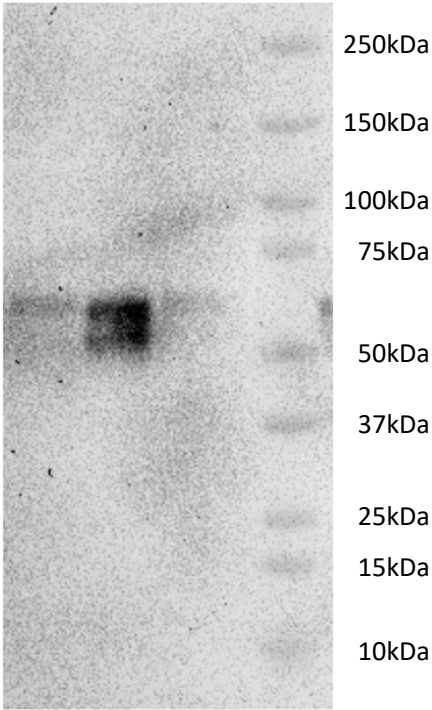

Anti-PD-L1

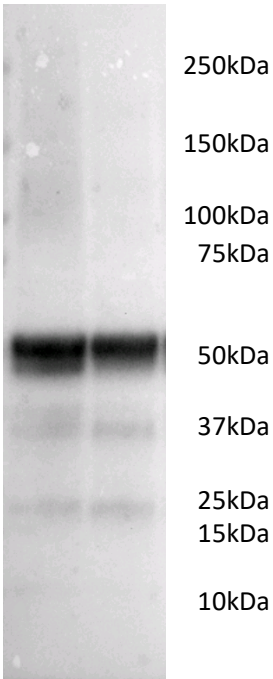

Anti-Alpha-Tubulin

Figure 6k

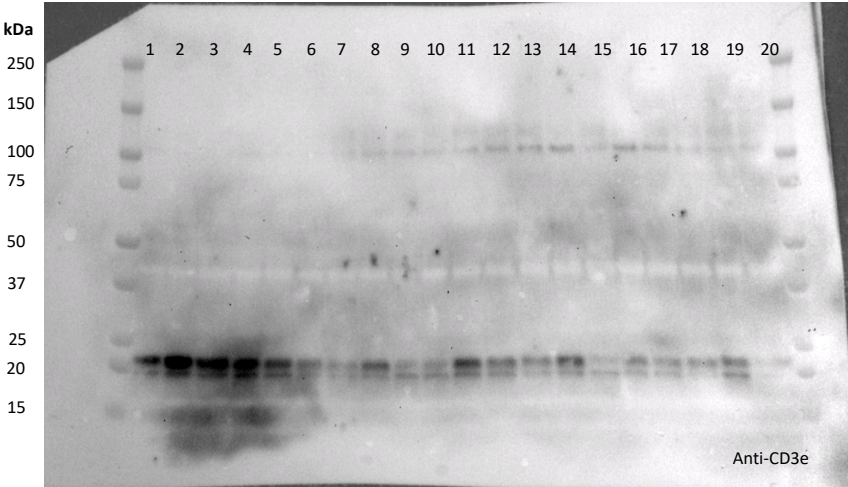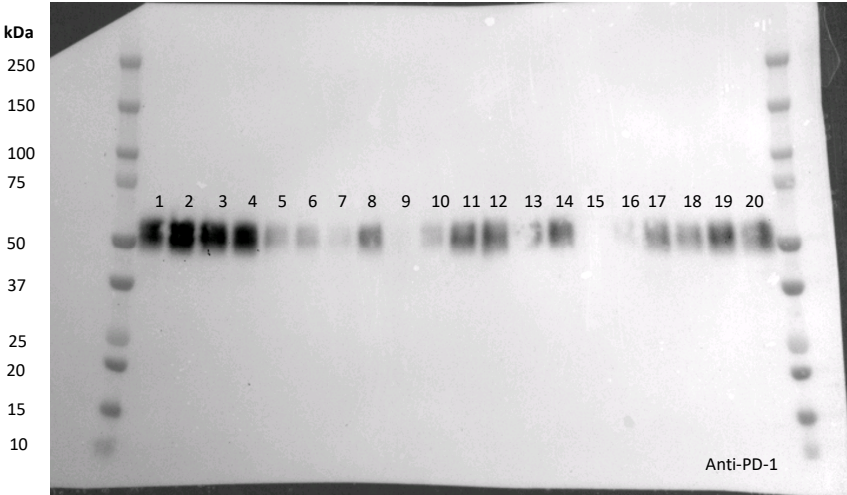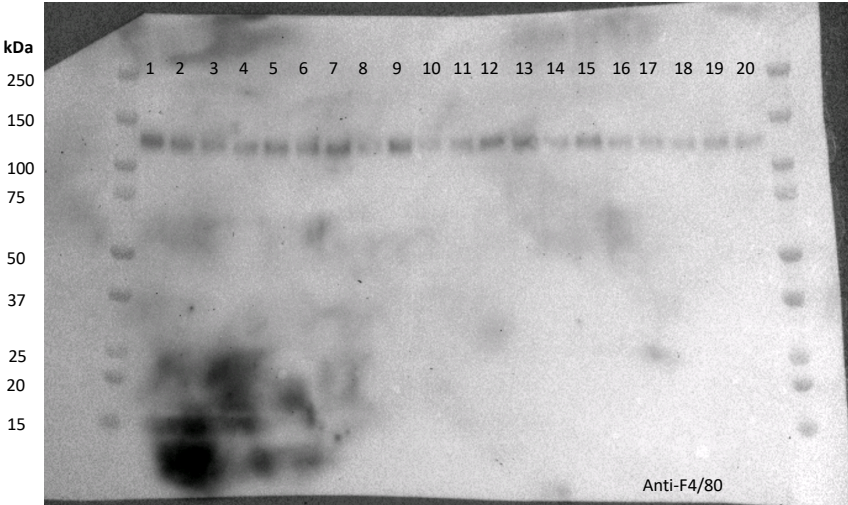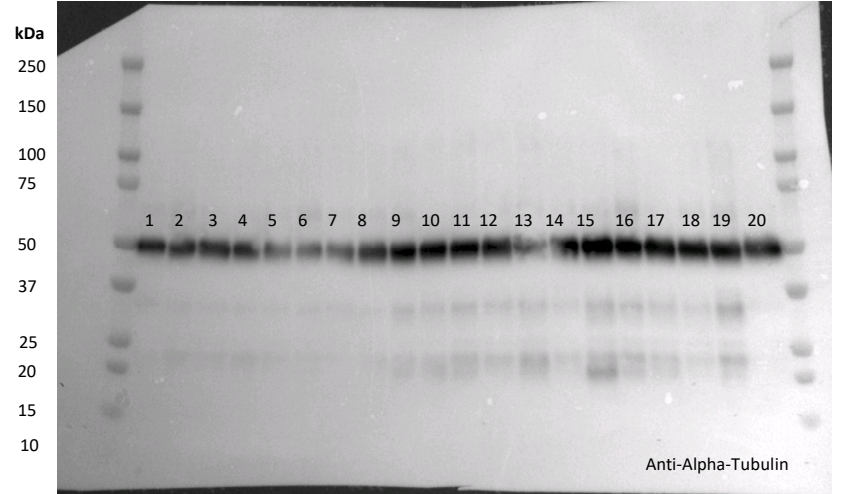

Figure 6l

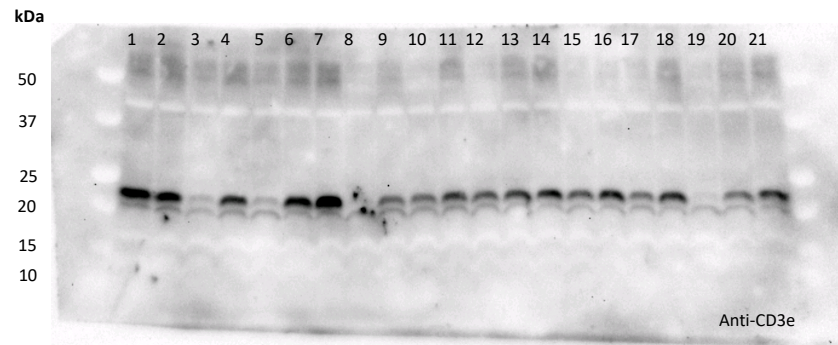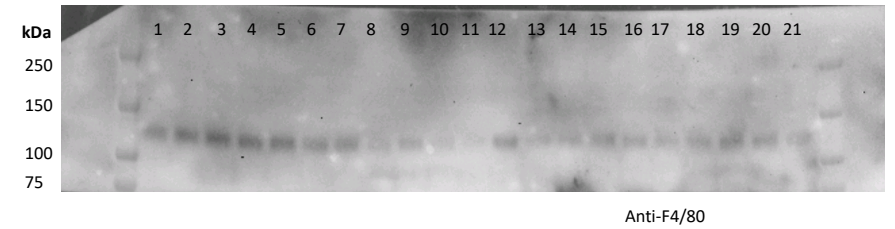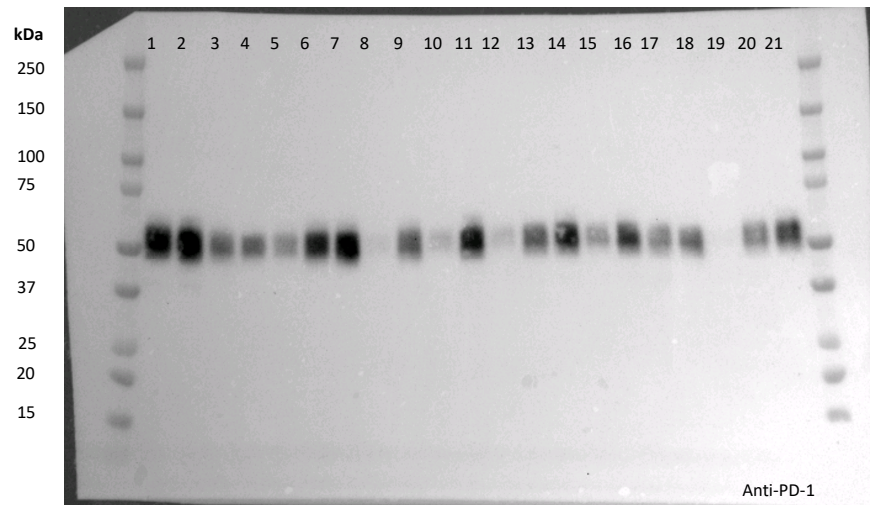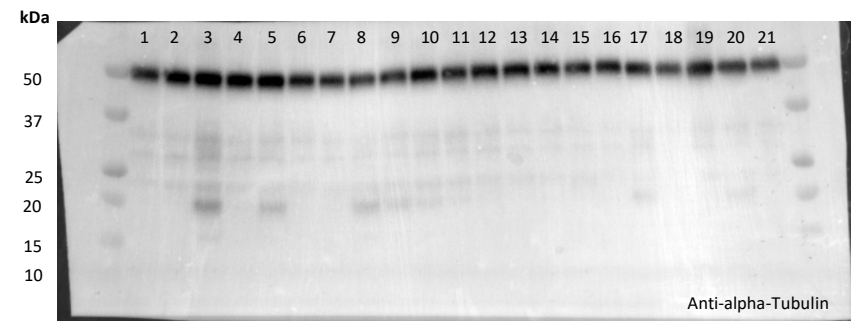

Supplement: s1 [file s1]
